# Supplementary material for: Merrifield resin-assisted routes to second-generation catalysts for olefin metathesis
Source: Royal Society of Chemistry journal article supplement (doi:10.1039/c7cy02278f), 2018-01-01
Supplement: c7cy02278f1.pdf [file c7cy02278f1.pdf]

Supplementary Information for:

## **Merrifield Resin-Assisted Routes to Second-Generation Catalysts for Olefin**

### **Metathesis**

Daniel L. Nascimento, Emma C. Davy, and Deryn E. Fogg\*

Centre for Catalysis Research & Innovation, and Department of Chemistry and Biomolecular  
Sciences, University of Ottawa, Ottawa, Ontario, Canada K1N 6N5

#### **Table of Contents**

|                                                                                             |     |
|---------------------------------------------------------------------------------------------|-----|
| S1. NMR Spectra for Second-Generation Catalysts Synthesized with Merrifield-Iodide Resin... | S2  |
| S2. NMR Spectra of Isotopically-Labelled Imidazolinium Salts.....                           | S7  |
| S3. NMR Spectra of New Labelled Ligands and Complexes.....                                  | S11 |

---

\* Corresponding Author.

## S1. NMR Spectra for Second-Generation Catalysts Synthesized with Merrifield-Iodide Resin

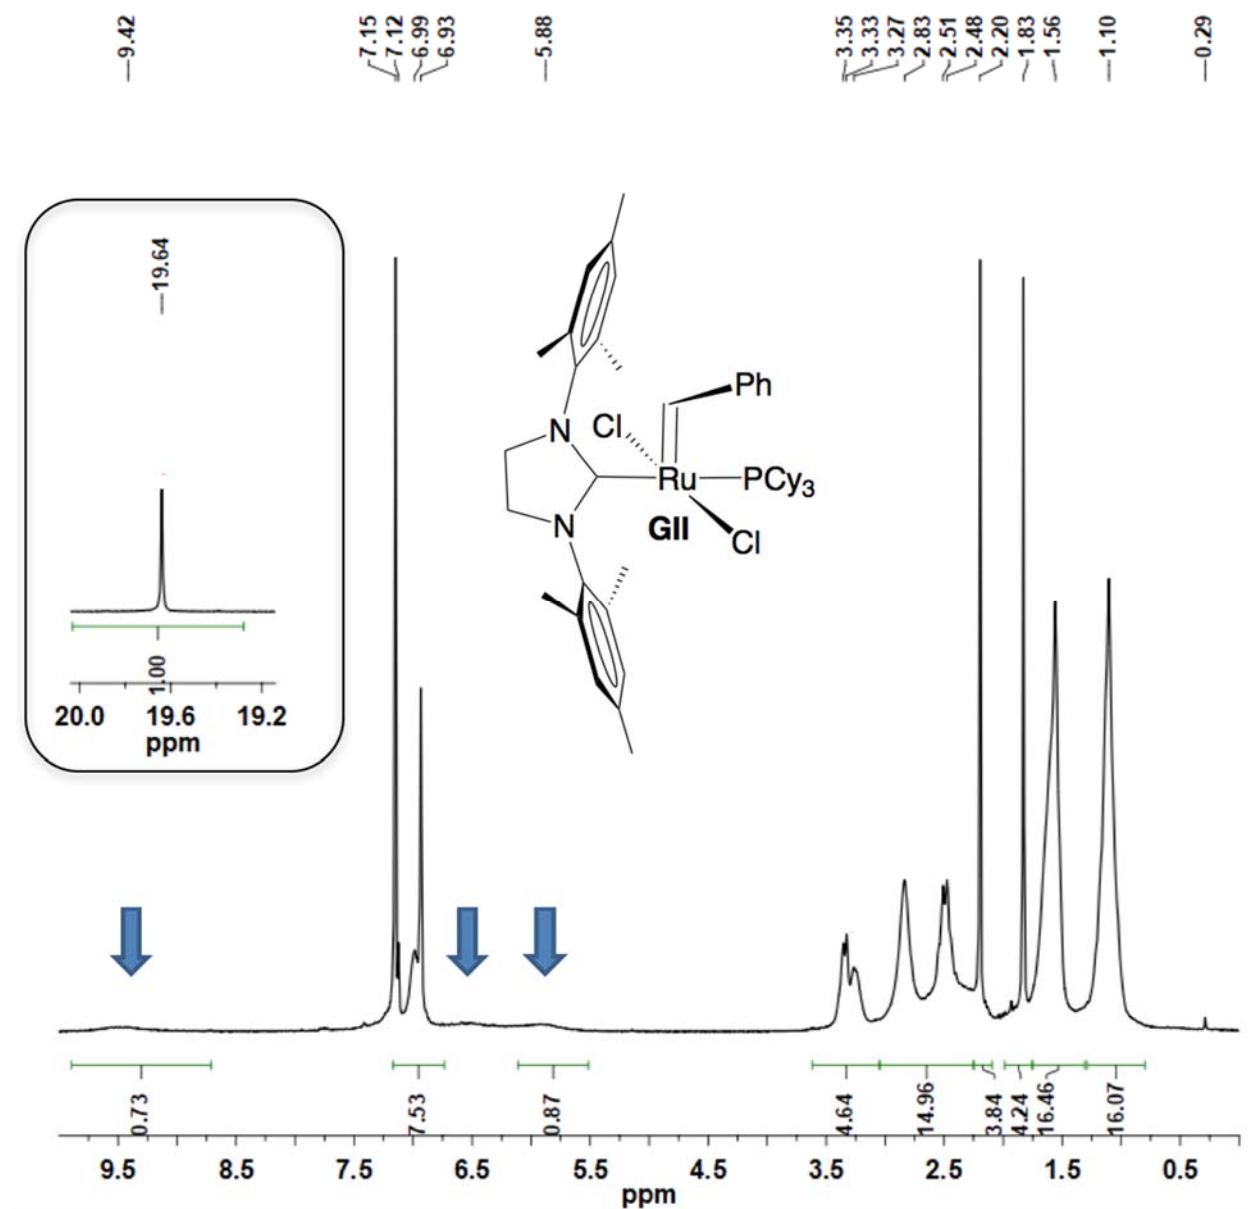

**Figure S1a.**  $^1\text{H}$  NMR spectrum (C<sub>6</sub>D<sub>6</sub>, 300 MHz) of **GII**, prepared from **GI** by ligand exchange and worked up using **MF-I** to scavenge free  $\text{PCy}_3$ . Arrows denote the broad signals arising from rotation of the aromatic rings.

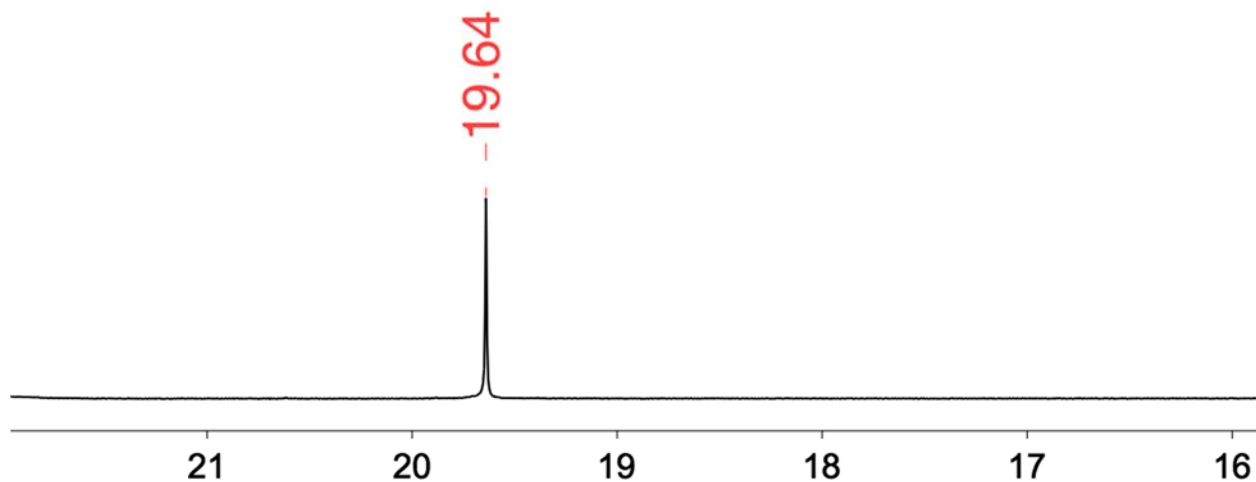

**Figure S1b.** Expanded alkydine region for the spectrum of Fig. S1a, showing the absence of additional signals.

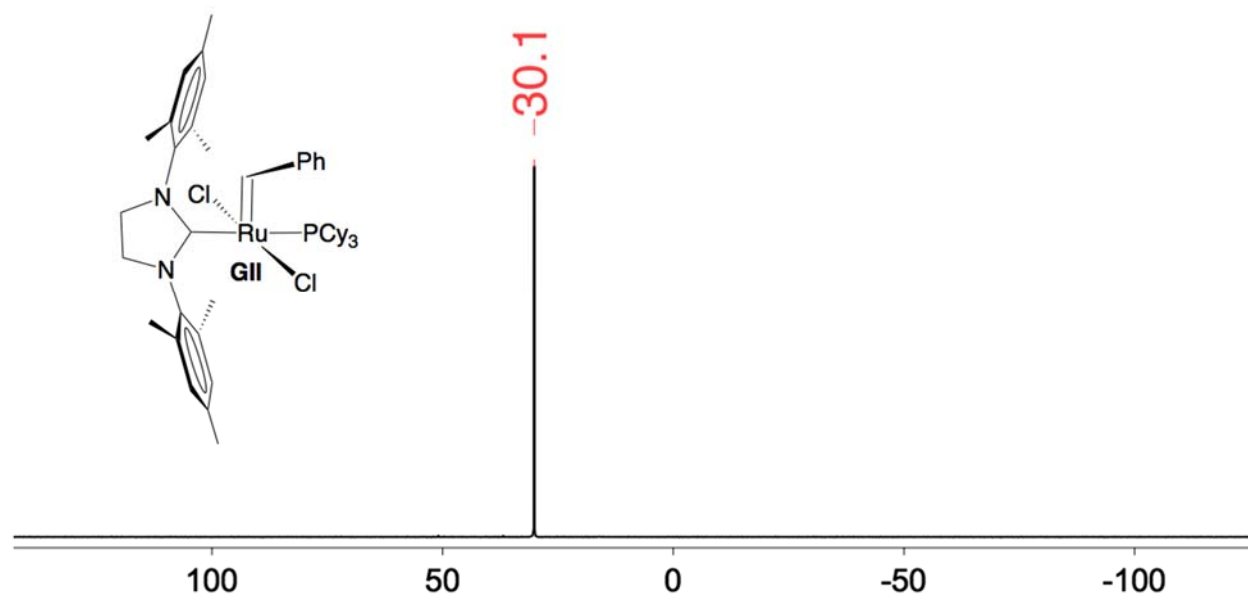

**Figure S1c.**  $^{31}\text{P}\{^1\text{H}\}$  NMR spectrum ( $\text{C}_6\text{D}_6$ , 121.2 MHz) of **GI**, prepared from **GI** by ligand exchange and worked up using **MF-I** to scavenge free  $\text{PCy}_3$ .

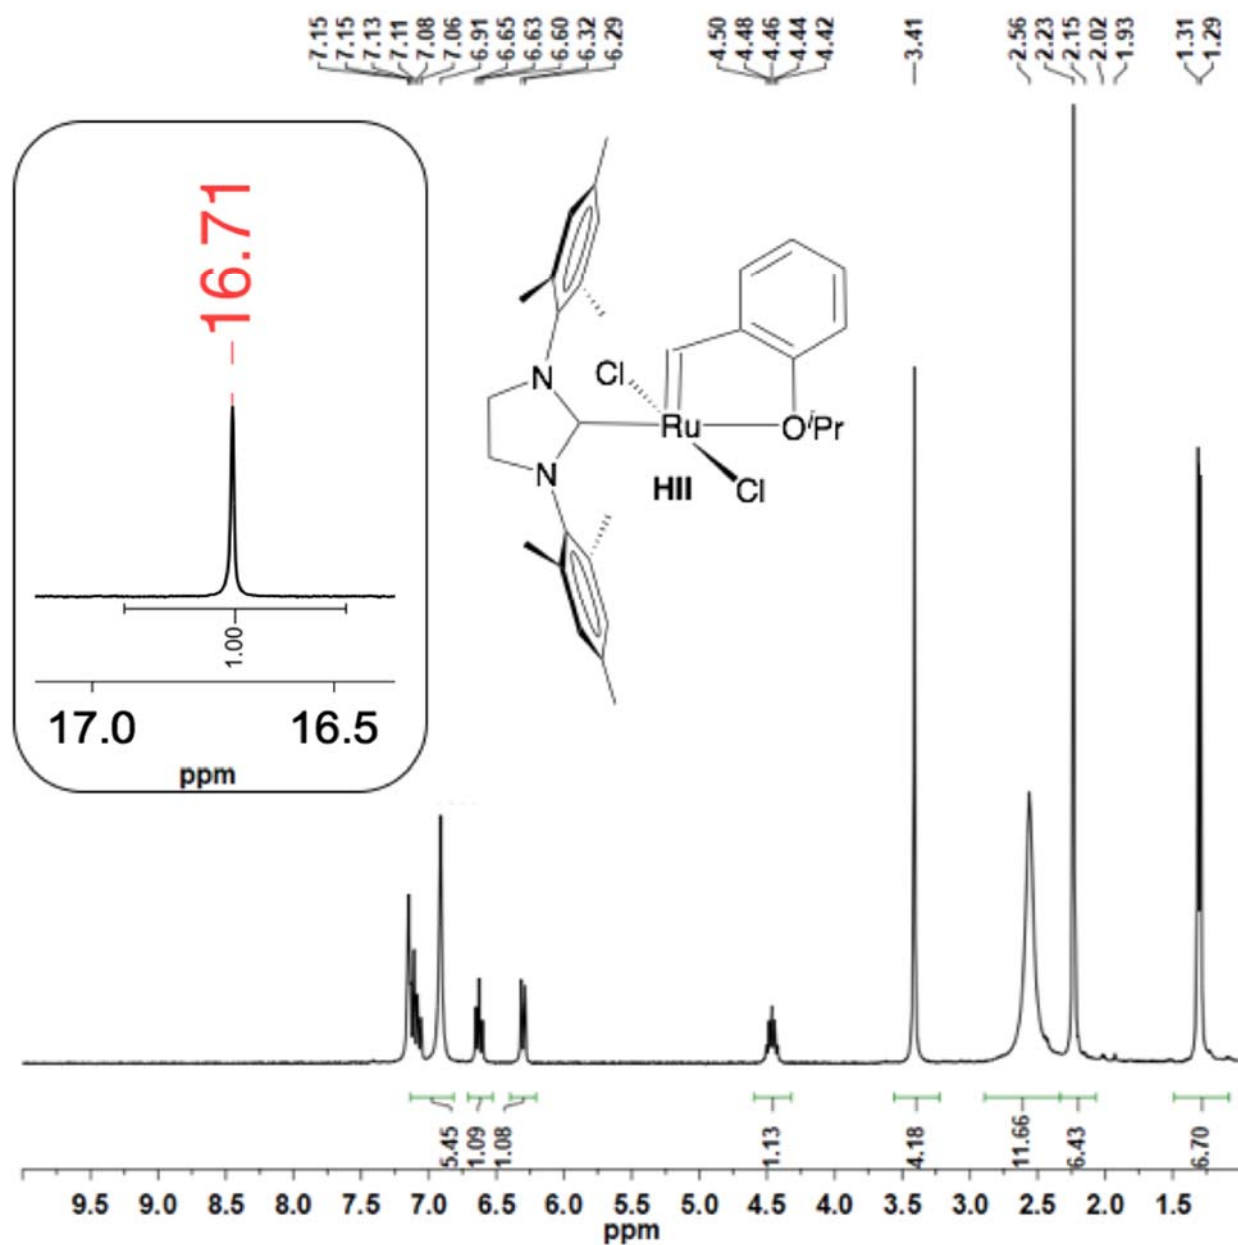

**Figure S2a.**  $^1\text{H}$  NMR spectrum ( $\text{C}_6\text{D}_6$ , 300 MHz) of **HII**, prepared from **HI** by ligand exchange and worked up using **MF-I** to scavenge free  $\text{PCy}_3$ .

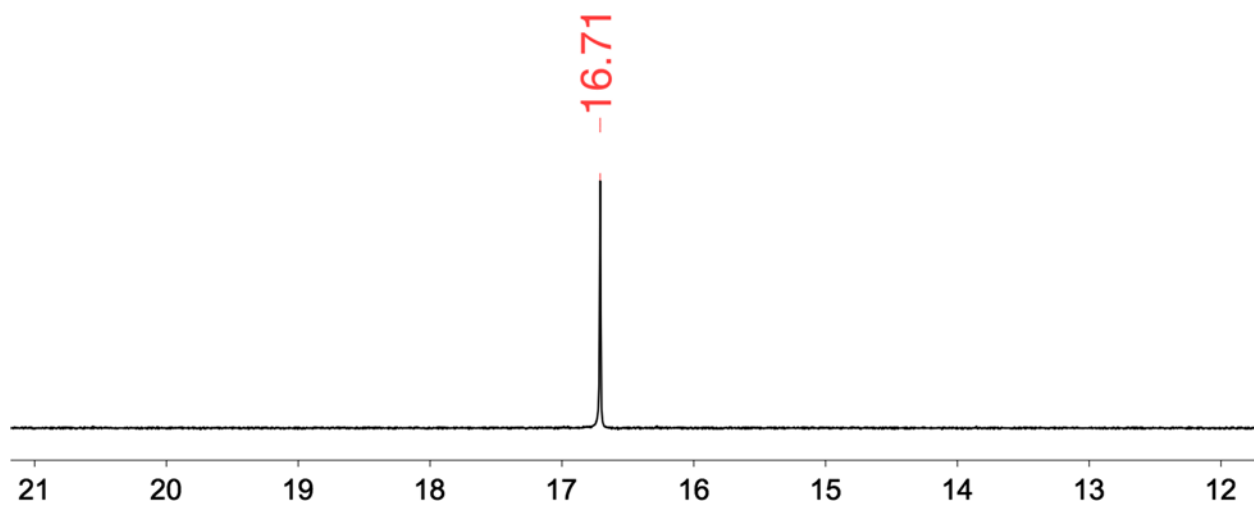

**Figure S2b.** Full alkydene region for the spectrum of Fig. S2a, showing the absence of additional signals.

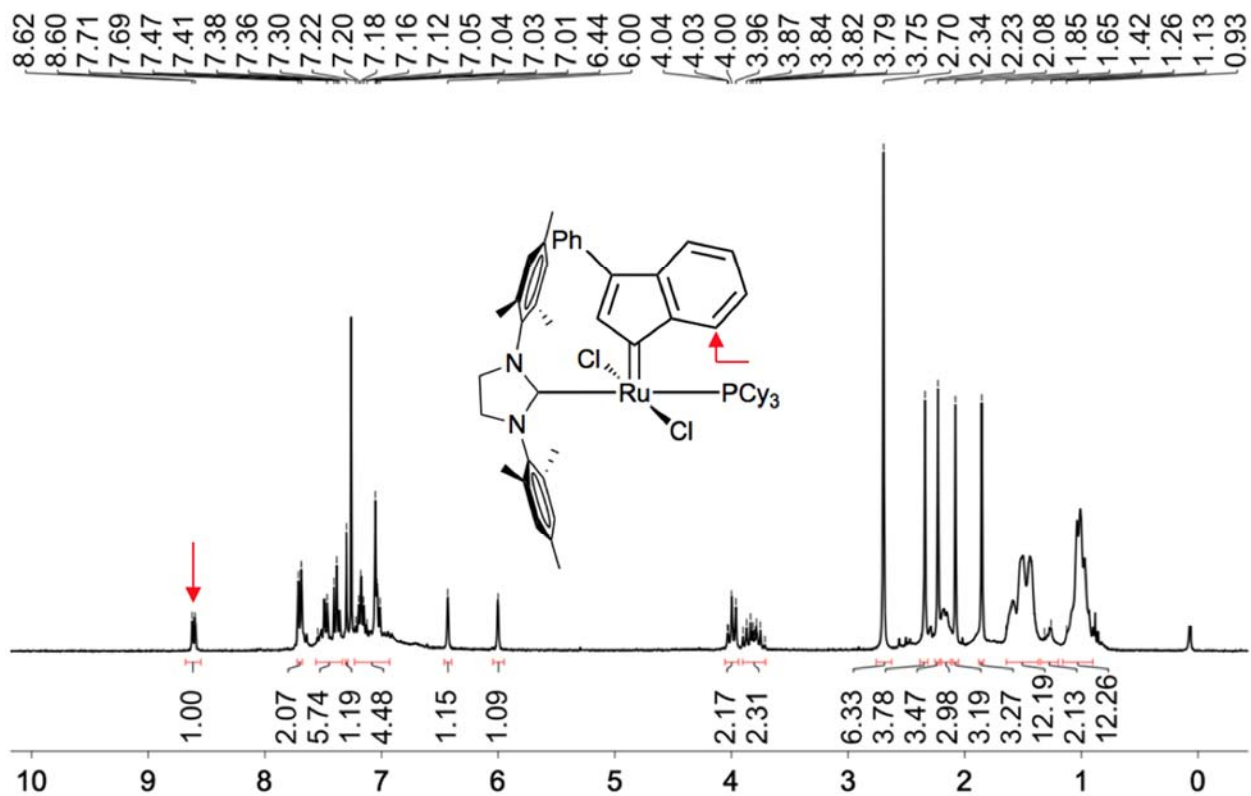

**Figure S3a.** <sup>1</sup>H NMR spectrum (CDCl<sub>3</sub>, 300 MHz) of **InII**, prepared from **InI** by ligand exchange and worked up using **MF-I** to scavenge free PCy<sub>3</sub>. Arrow indicates the location of the proton used to confirm the stability of **InII** in decomposition experiments.

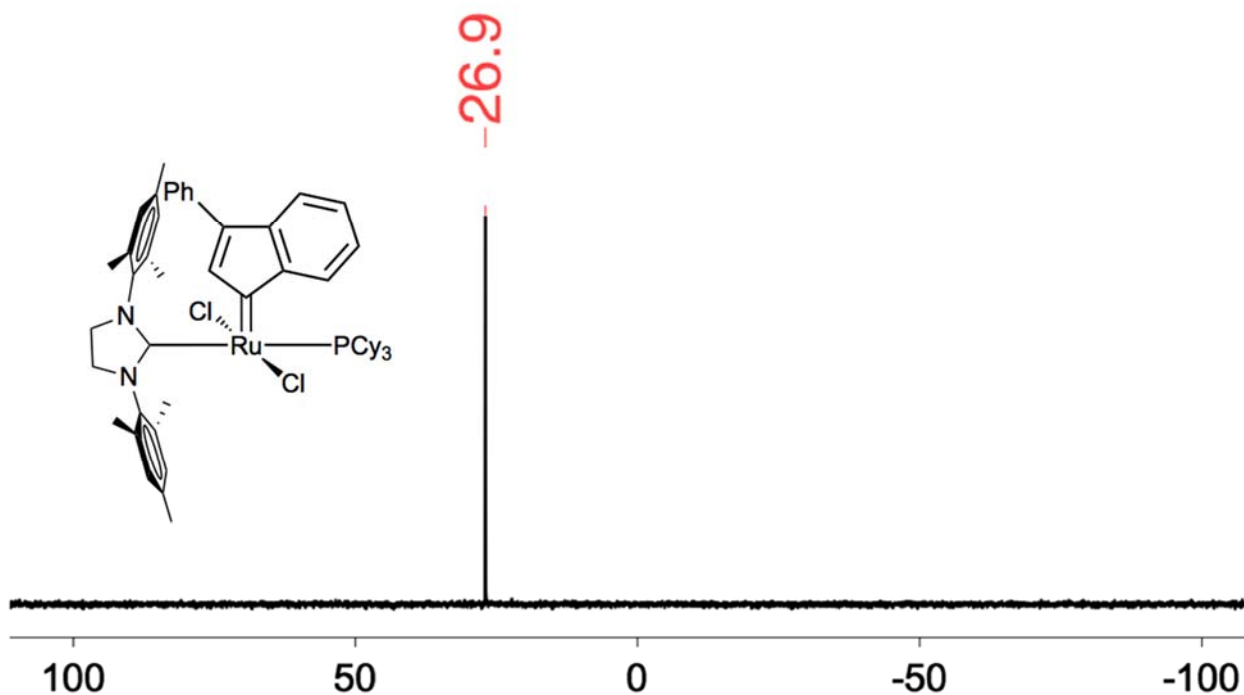

**Figure S3b.** <sup>31</sup>P{<sup>1</sup>H} NMR spectrum (CDCl<sub>3</sub>, 121.2 MHz) of **InII**, prepared from **InI** by ligand exchange and worked up using **MF-I** to scavenge free PCy<sub>3</sub>.

## S2. NMR Spectra of Isotopically-Labelled Imidazolium Salts.

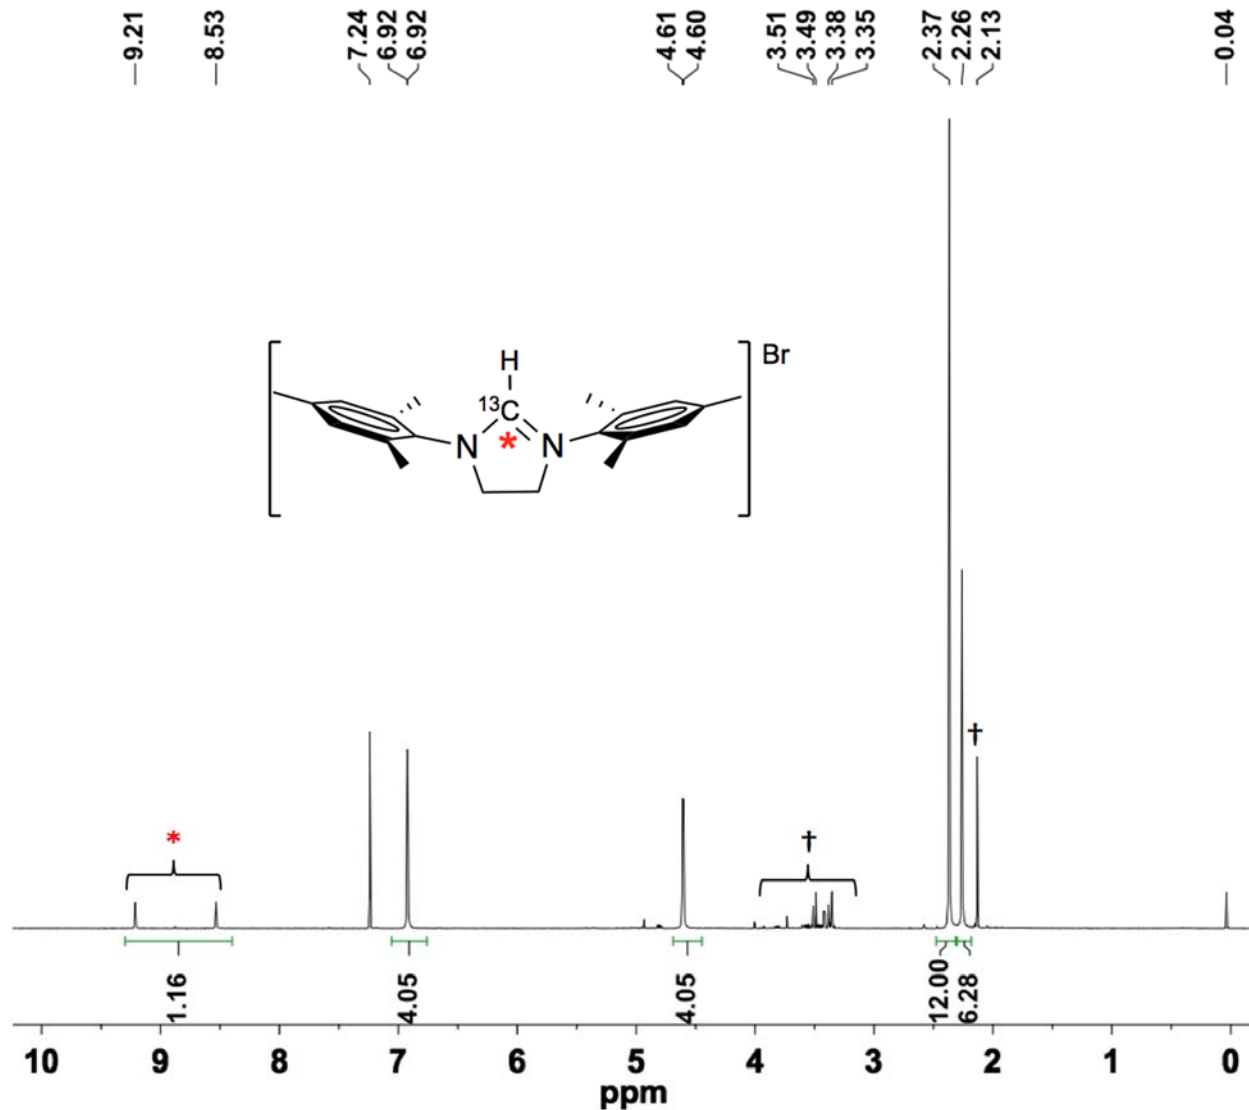

**Figure S4a.** <sup>1</sup>H NMR spectrum (300 MHz, CDCl<sub>3</sub>) of <sup>13</sup>C-H<sub>2</sub>IMes·HBr (\* = <sup>13</sup>CH doublet showing <sup>1</sup>J<sub>CH</sub> coupling of 204 Hz; †) = solvent and *N*-bromosuccinimide impurities removed in the next step).

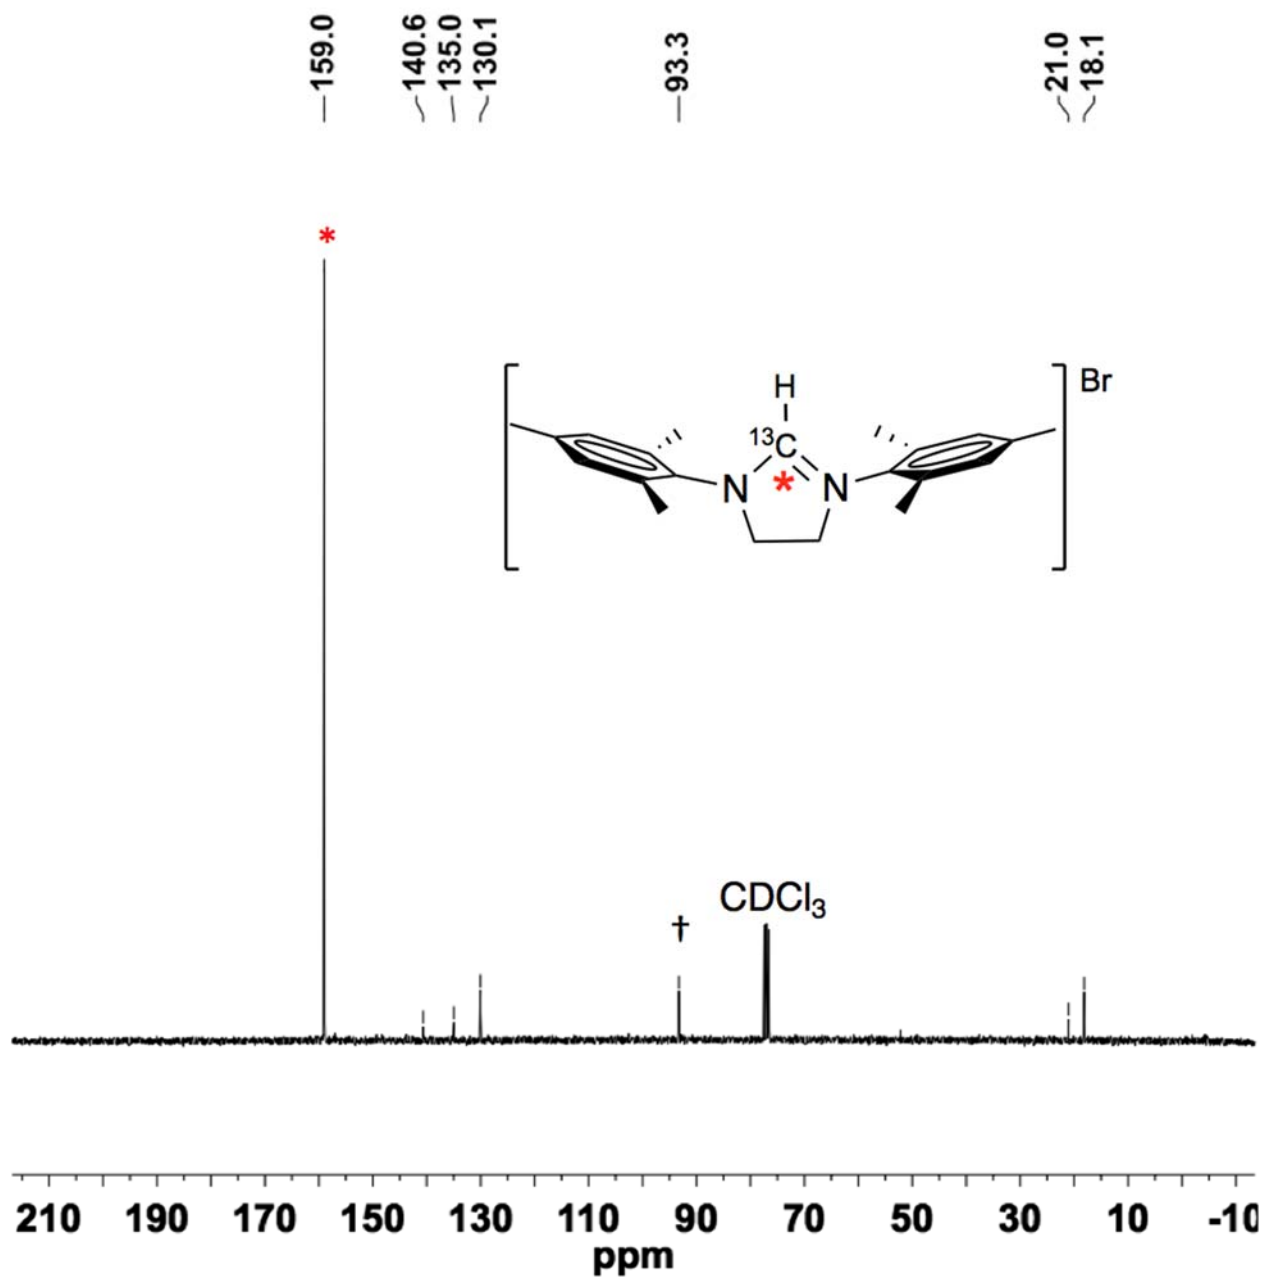

**Figure S4b.**  $^{13}\text{C}\{^1\text{H}\}$  NMR spectrum ( $\text{CDCl}_3$ , 75.5 MHz) of  $^{13}\text{C}\text{-H}_2\text{IMes}\cdot\text{HBr}$  (\* =  $^{13}\text{C}$ -labelled carbon). (†) designates unidentified impurity.



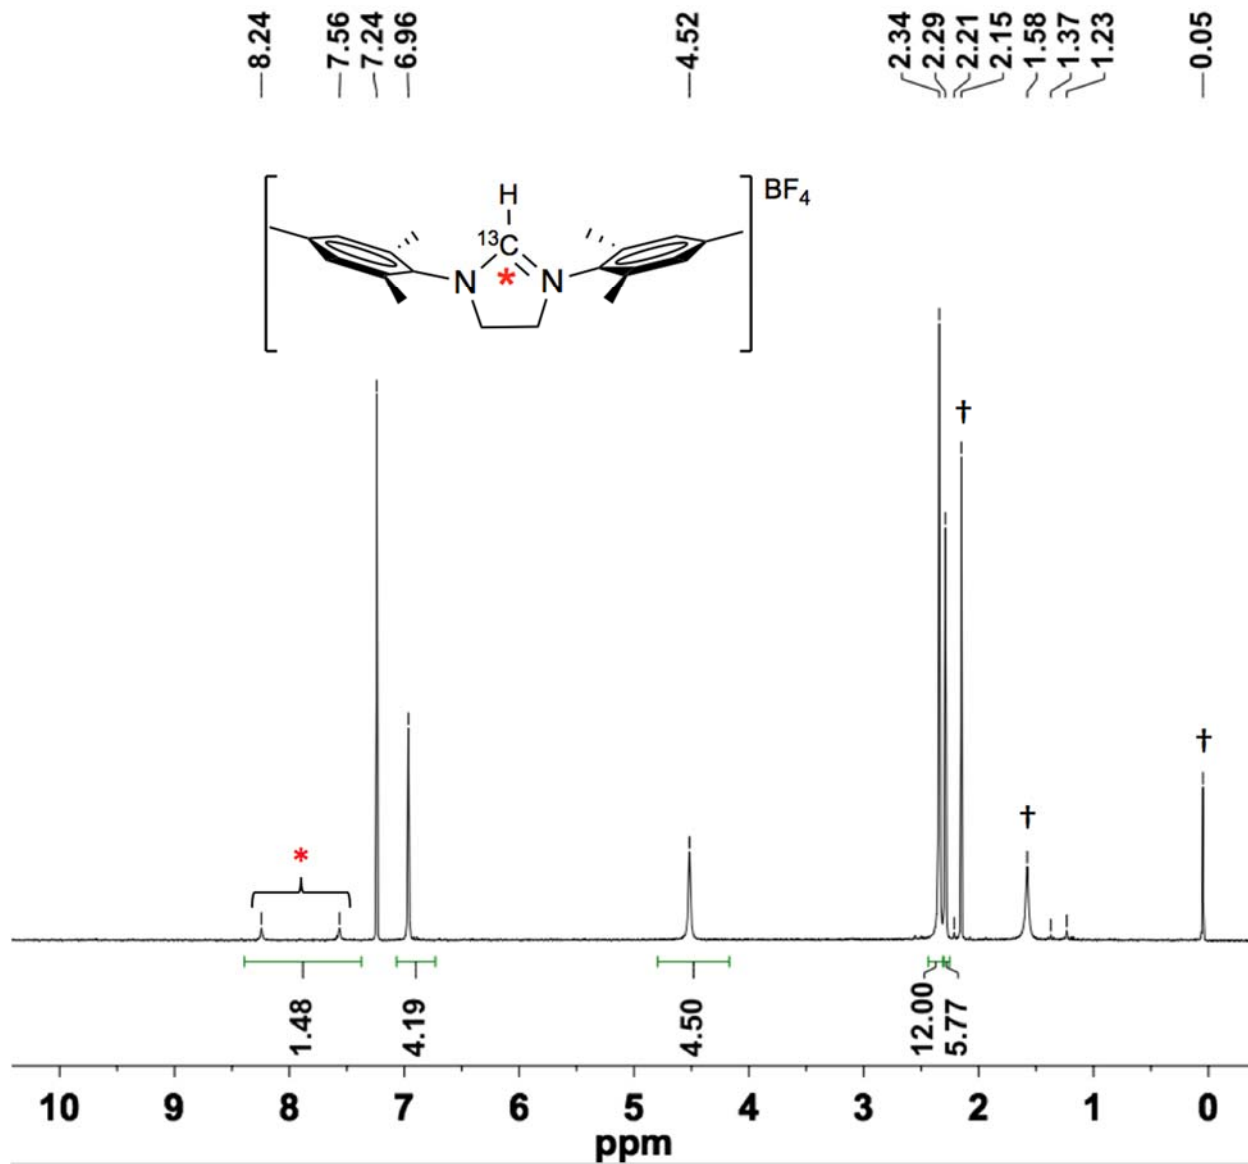

**Figure S5a.**  $^1\text{H}$  NMR spectrum (300 MHz,  $\text{CDCl}_3$ ) of  $^{13}\text{C}\text{-H}_2\text{IMes}\cdot\text{HBF}_4$  (\* =  $^{13}\text{CH}$  doublet showing  $^1J_{\text{CH}}$  coupling of 205 Hz; (†) = acetone, water, and silicon grease impurities).

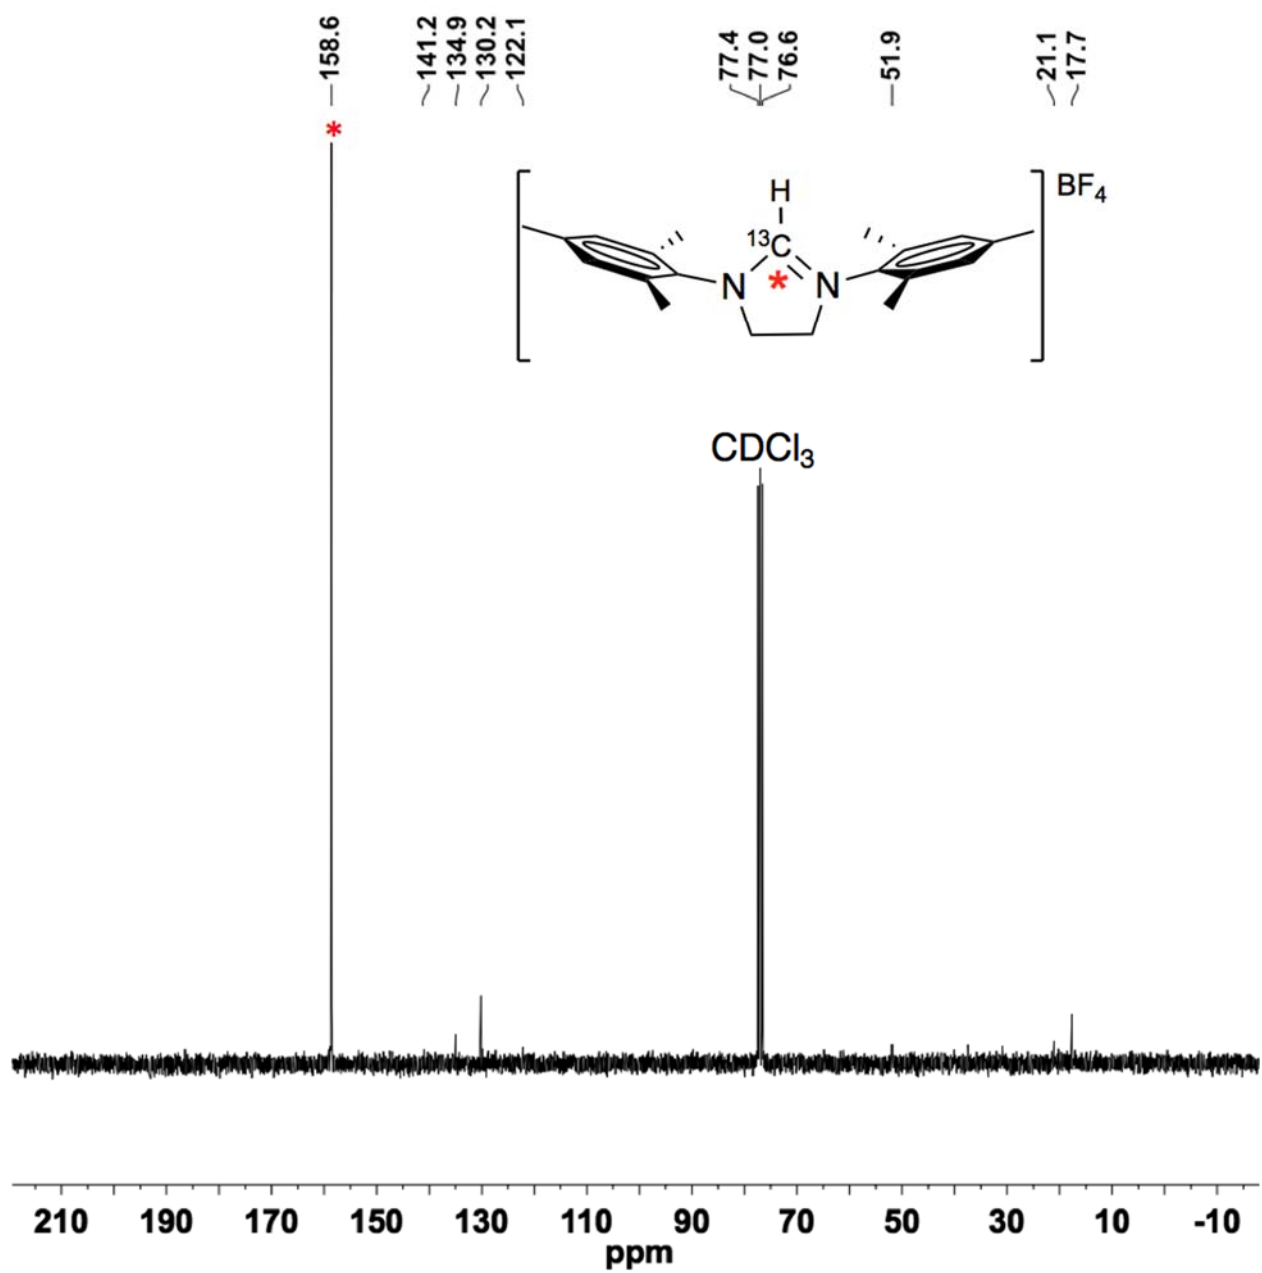

**Figure S5b.**  $^{13}\text{C}\{^1\text{H}\}$  NMR spectrum ( $\text{CDCl}_3$ , 75.5 MHz) of  $^{13}\text{C}\text{-H}_2\text{IMes}\cdot\text{HBF}_4$  (\* =  $^{13}\text{C}$ -labelled carbon).

### S3. NMR Spectra of New Labelled Ligands and Complexes

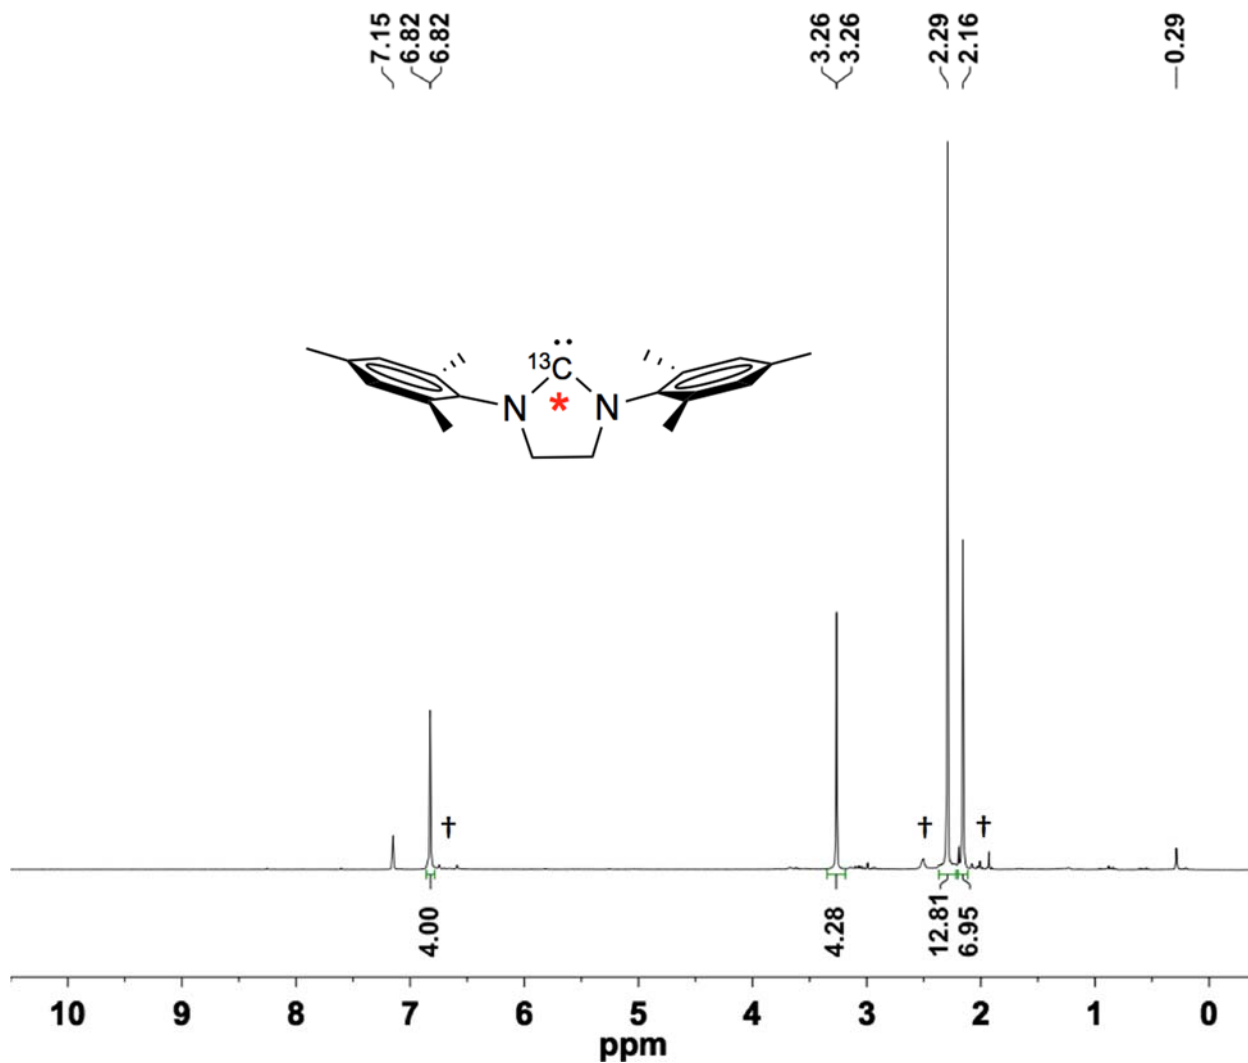

**Figure S6a.** <sup>1</sup>H NMR spectrum (C<sub>6</sub>D<sub>6</sub>, 300 MHz) of free <sup>13</sup>C-H<sub>2</sub>IMes; (†) = impurity generated by hydrolysis from residual water in deuterated solvent: see text and Scheme 2e.

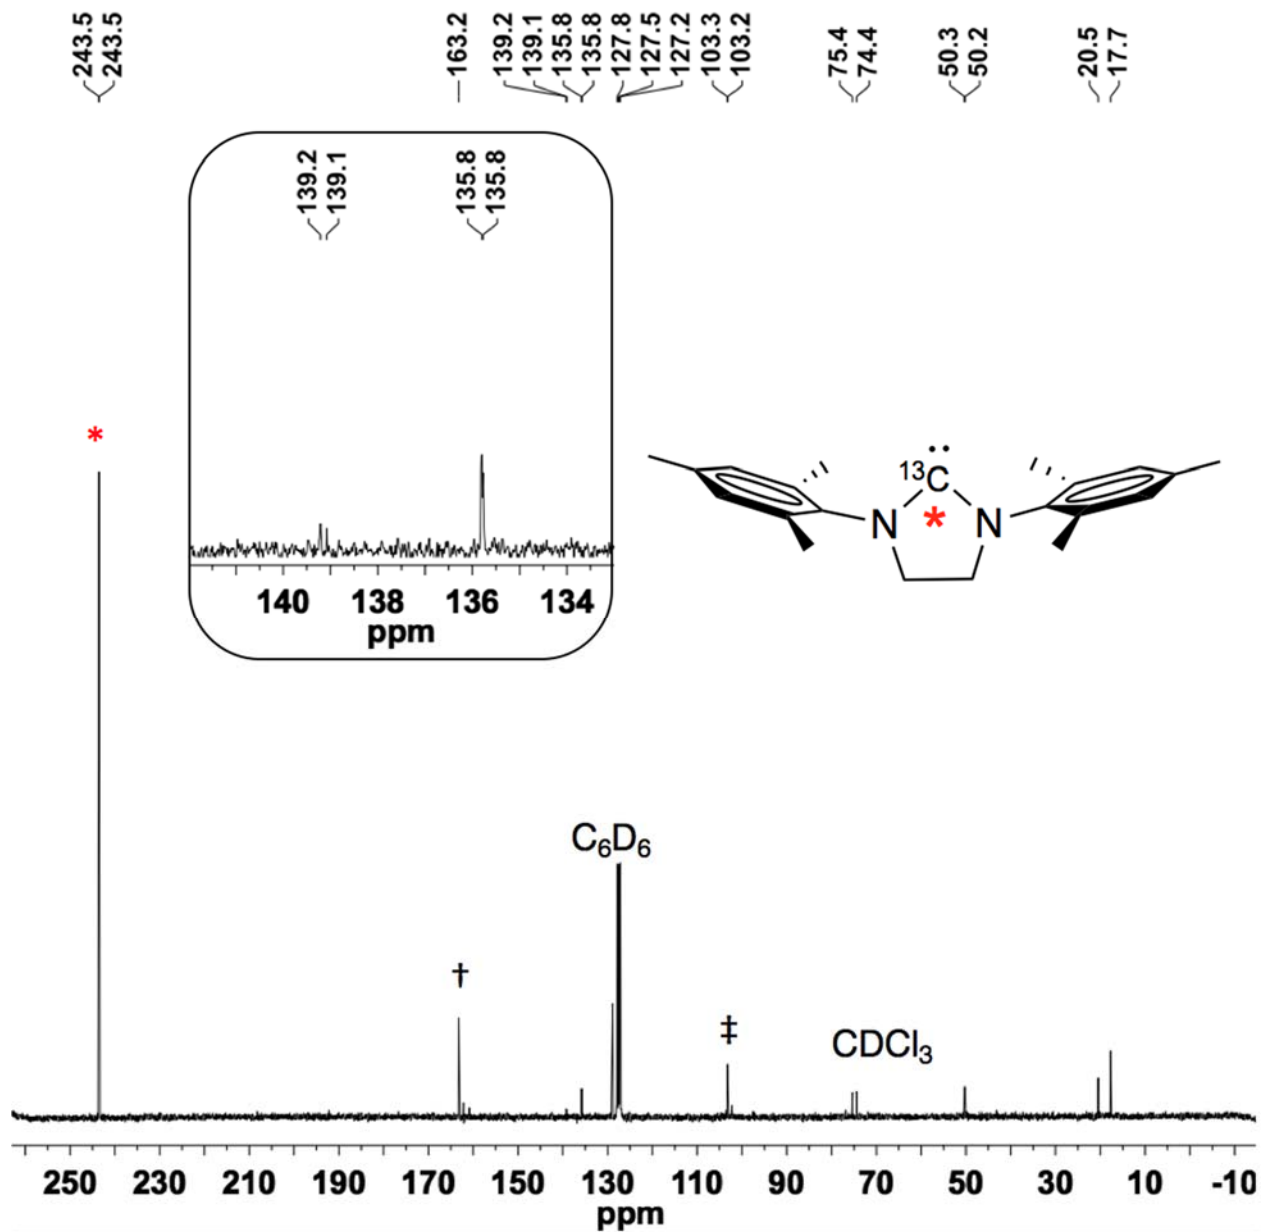

**Figure S6b.**  $^{13}\text{C}\{^1\text{H}\}$  NMR spectrum ( $\text{C}_6\text{D}_6$ , 75.5 MHz) of  $^{13}\text{C}\text{-H}_2\text{IMes}$  (\* =  $^{13}\text{C}$ -labelled carbon; (†) = impurity generated by hydrolysis from residual water in deuterated solvent: see text and Scheme 2e. (‡) = unidentified impurity).

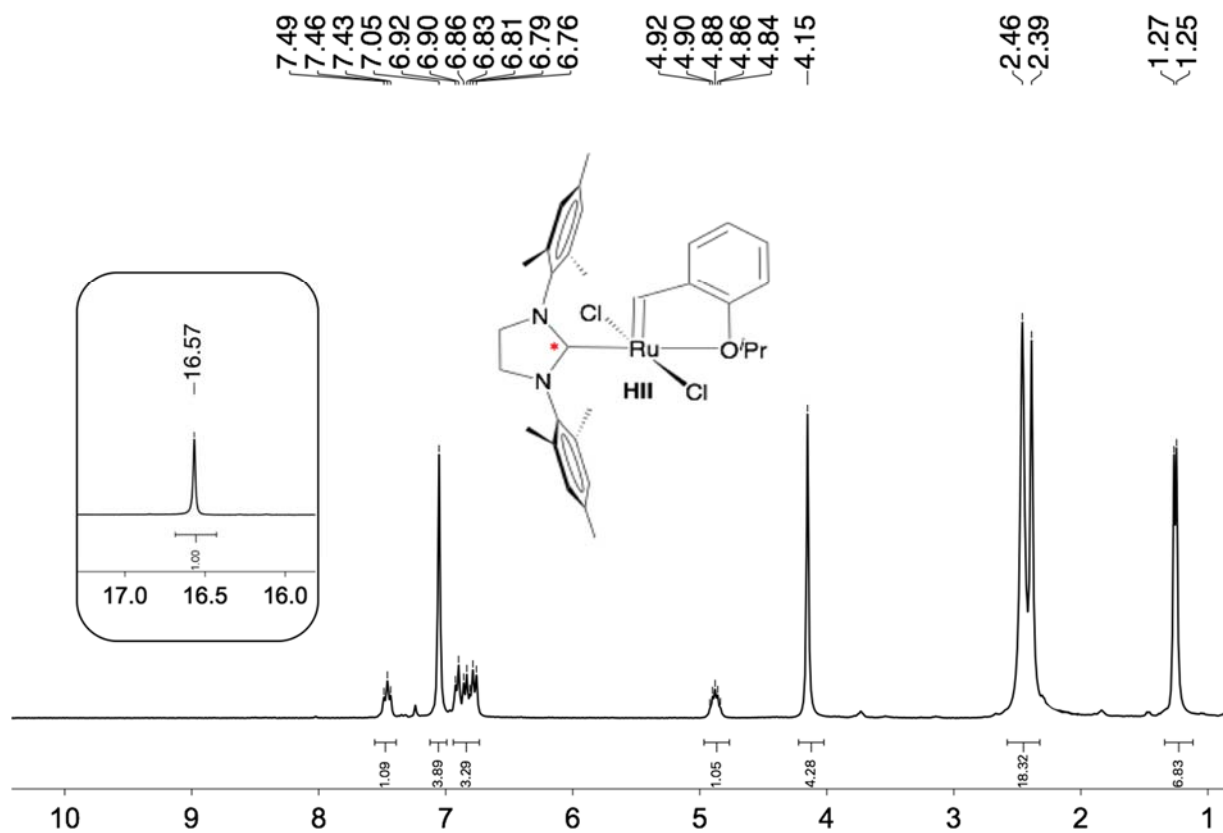

**Figure S7a.**  $^1\text{H}$  NMR spectrum (CDCl<sub>3</sub>, 300 MHz) of  $^{13}\text{C}$ -HII (\* =  $^{13}\text{C}$ -labelled carbon).

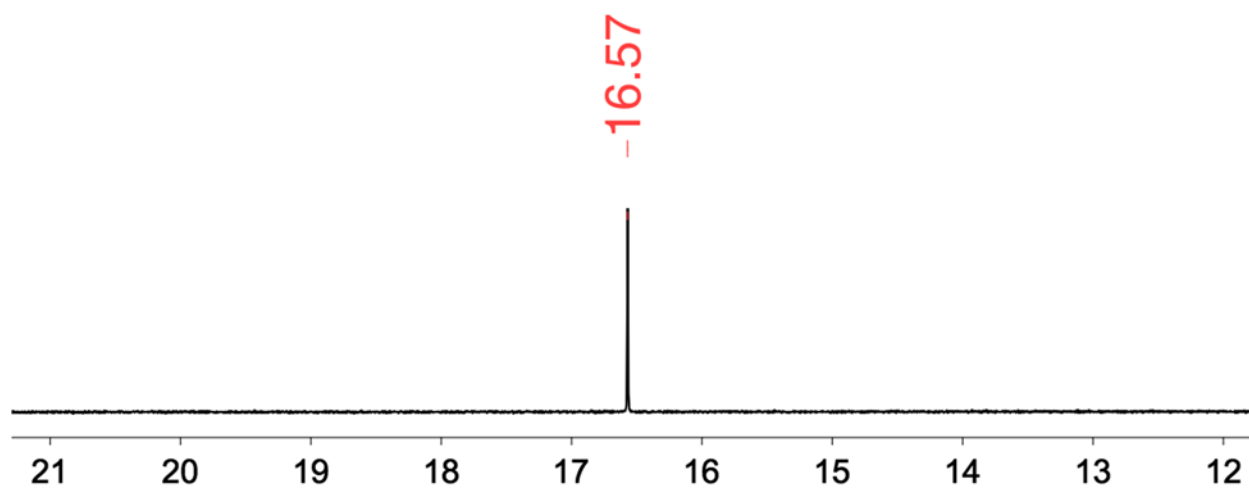

**Figure S7b.** Full alkylidene region for the spectrum of Fig. S7a, showing the absence of additional signals.

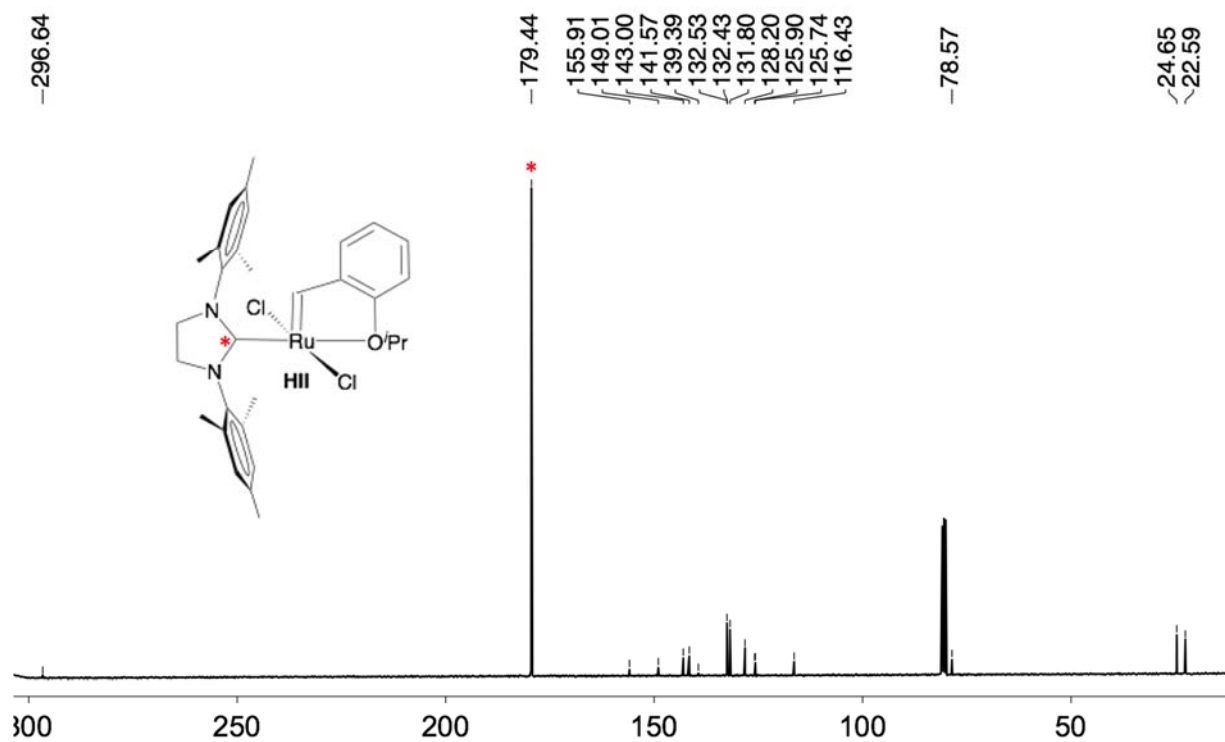

**Figure S7c.**  $^{13}\text{C}\{^1\text{H}\}$  NMR spectrum ( $\text{CDCl}_3$ , 75.5 MHz) of  $^{13}\text{C}$ -HII (\* =  $^{13}\text{C}$ -labelled carbon).

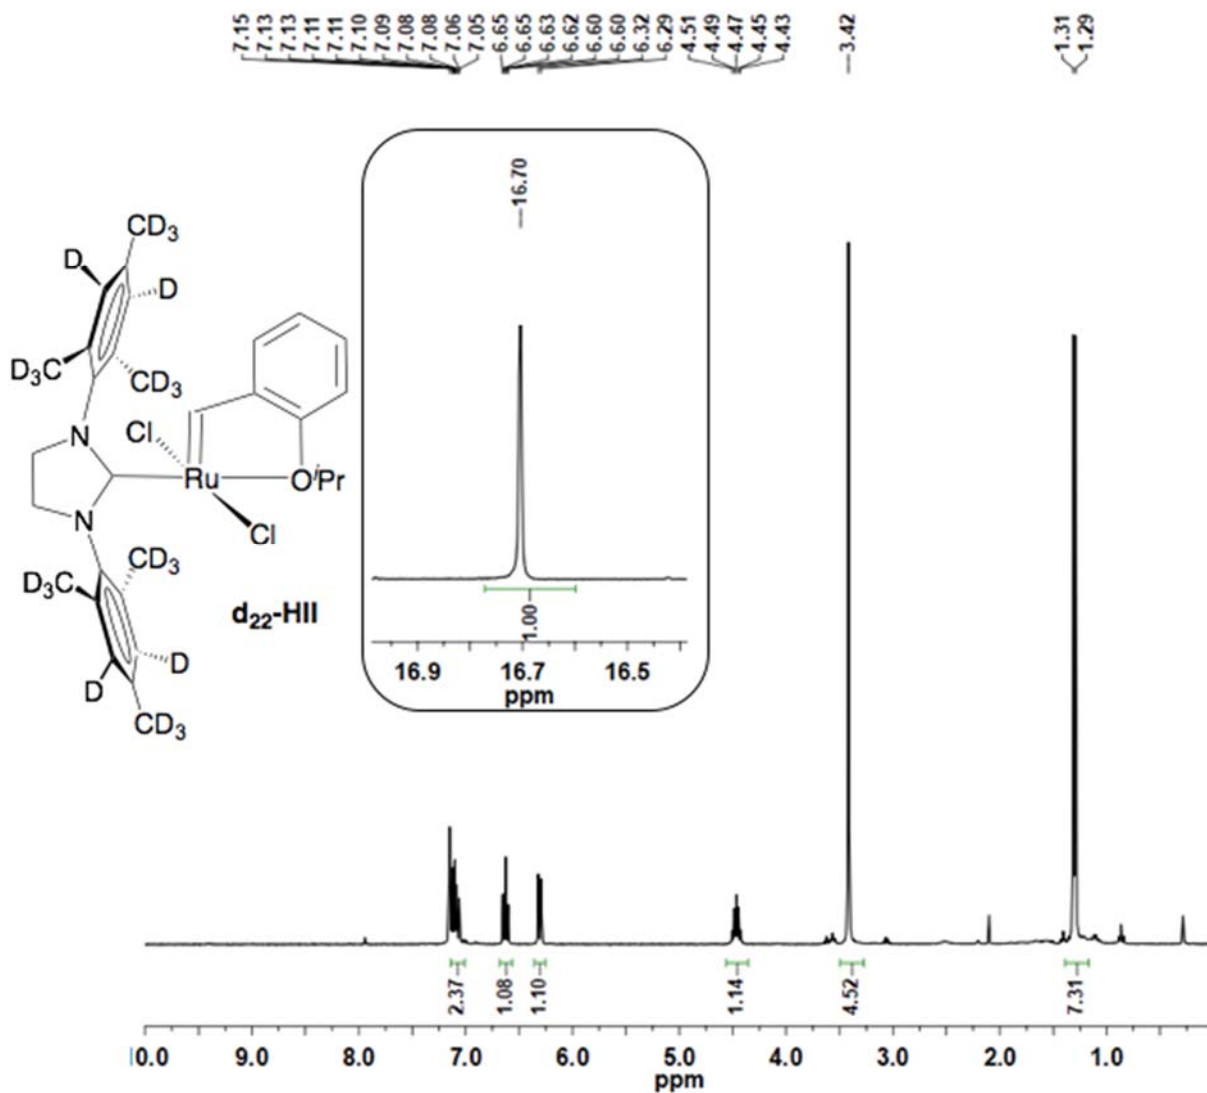

**Figure S8a.**  $^1\text{H}$  NMR spectrum ( $\text{C}_6\text{D}_6$ , 300 MHz) of  $\text{d}_{22}\text{-HII}$ .

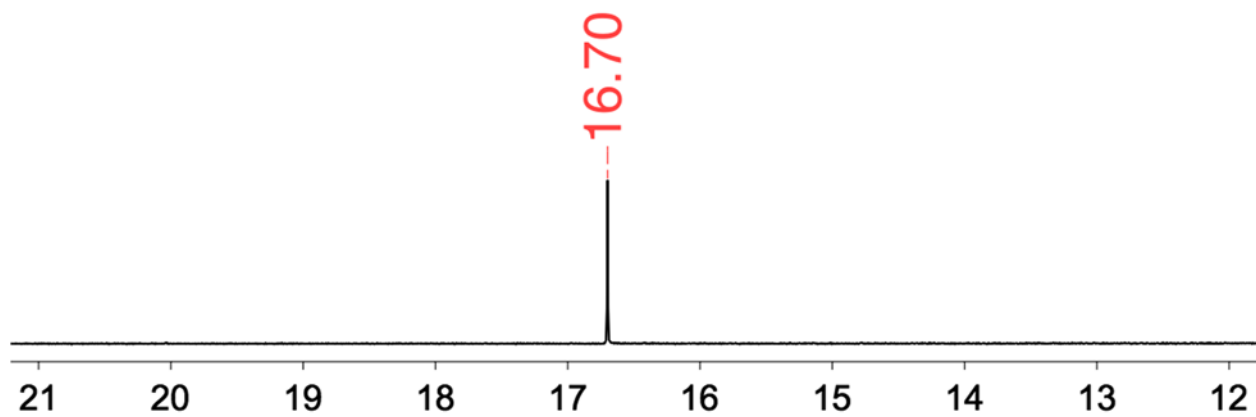

**Figure S8b.** Full alkylidene region for the spectrum of Fig. S8a, showing the absence of additional signals.

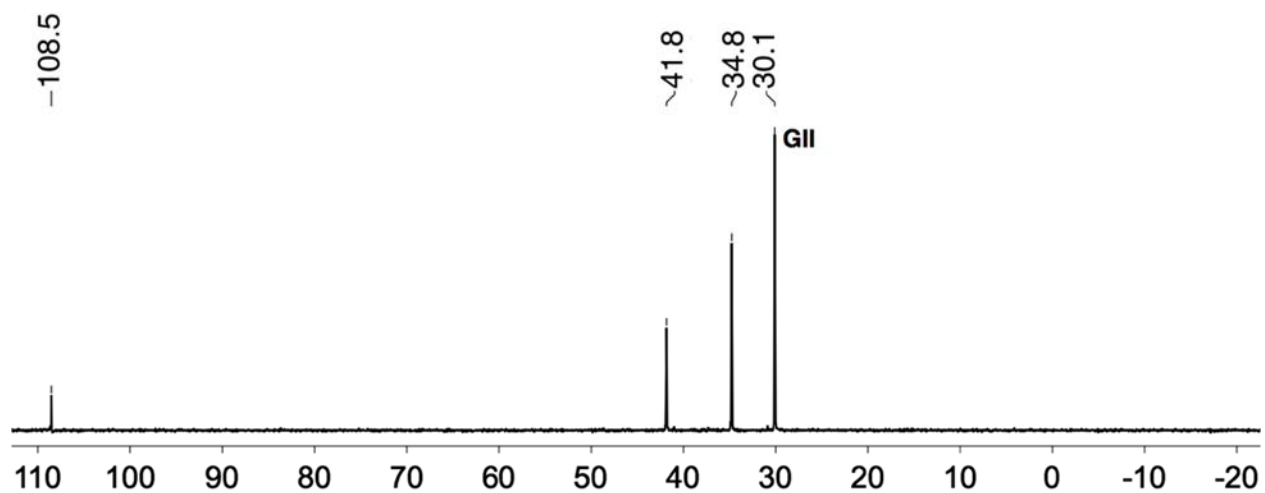

**Figure S9.**  $^{31}\text{P}\{^1\text{H}\}$  NMR spectrum ( $\text{C}_6\text{D}_6$ , 121.2 MHz) showing impurities present in a sample of **GII** prepared via Amberlyst-15 workup, using resin stored in the glovebox.
